# Supplementary material for: EK100 and Antrodin C Improve Brain Amyloid Pathology in APP/PS1 Transgenic Mice by Promoting Microglial and Perivascular Clearance Pathways
Source: MDPI journal article supplement (doi:10.3390/ijms221910413), 2021-09-27
Supplement: s1 [file s1]

## Supplementary material

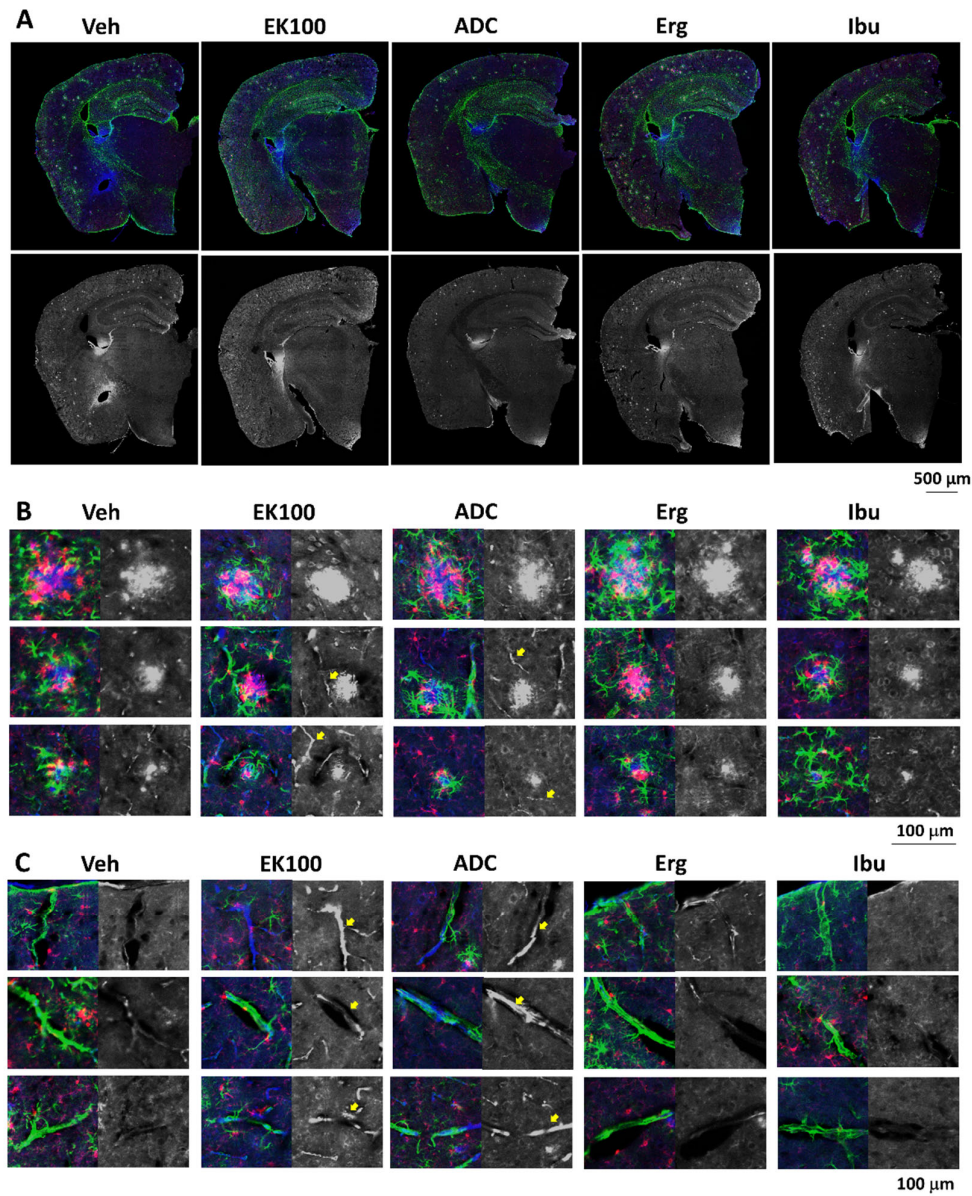

**Figure S1.** EK100 and antrodin C reduce amyloid plaque burden and plaque-associated glial cluster, and increase perivascular deposition of A $\beta$  in APP/PS1 mice. APP/PS1 transgenic mice orally administered with vehicle (Veh) or EK100, ergosterol (Erg), antrodin C (ADC) and ibuprofen (Ibu) (30 mg/kg/day, n=6 each) for 1 month, and then amyloid plaques and perivascular deposition of A $\beta$ , microglia, and astrocytes were immune-stained with AB10, Iba-1 and GFAP antibodies, respectively. The representative fluorescent images of AB10 (blue in the merged panel), Iba-1 (red in the merged panel) and GFAP (green in the merged panel) in the area including S1,

secondary auditory, and temporal association cortex were shown. Scale bar: 500  $\mu$ m in panel A and 100  $\mu$ m in panel B and C.

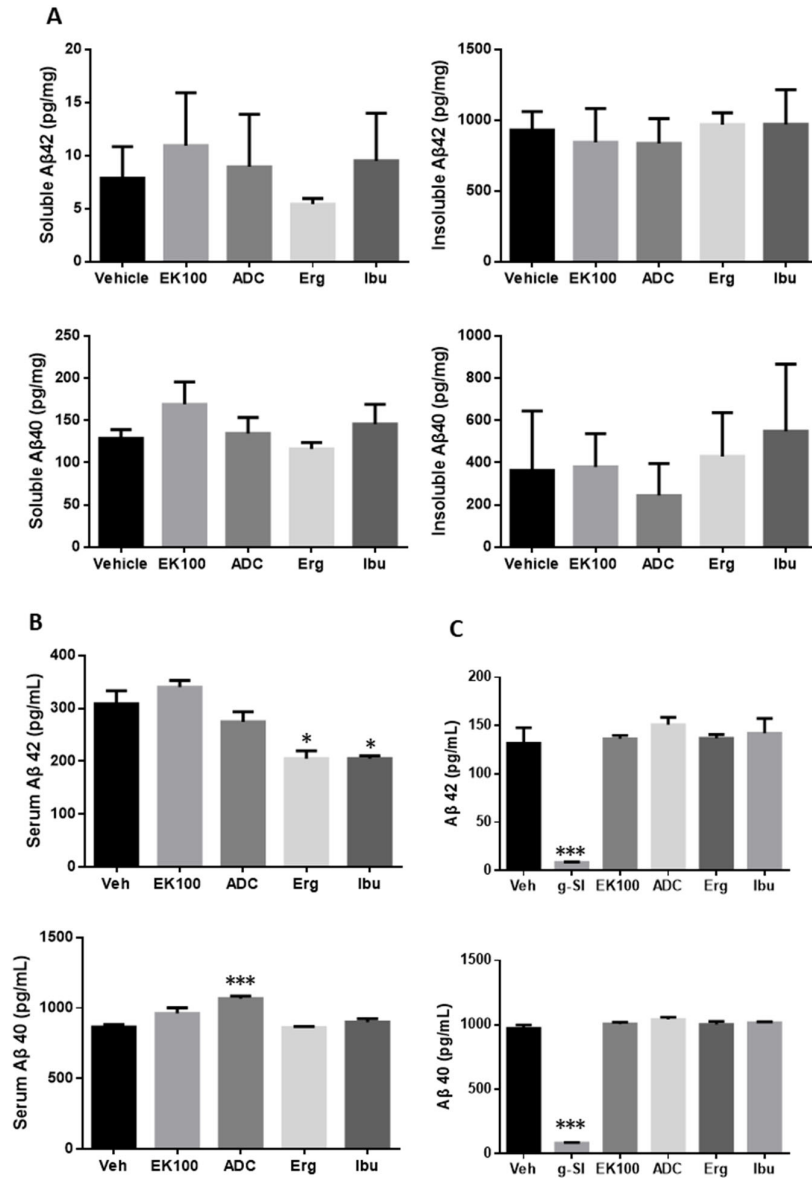

**Figure S2.** The effects of four reagents on A $\beta$  level in hippocampus and serum of APP/PS1 mice. APP/PS1 transgenic mice orally administered with vehicle (Veh) or EK100, ergosterol (Erg), antrodin C (ADC) and ibuprofen (Ibu) (30 mg/kg/day,  $n=6$

each) for 1 months, and then the level of A $\beta$ 1-40 and A $\beta$ 1-42 in hippocampal homogenates (A) and serum (B) were determined by enzyme-linked immunosorbent assay (ELISA). SH-SY5Y-APP695 cells were treated with 50 H-SY5Y-APP695 cells were treated with vehicle (Veh), 1  $\mu$ M of  $\gamma$ -secretase inhibitor (g-SI), or 50  $\mu$ M of EK100, ergosterol (Erg), antrodin C (ADC) and ibuprofen (Ibu) for 24 hr. A $\beta$ 1-40 and A $\beta$ 1-42 in the conditioned medium were measured by ELISAs. Significant difference between vehicle and treated cells are indicated by \*\*\* $p$ <0.001. ( $n$  = 4).

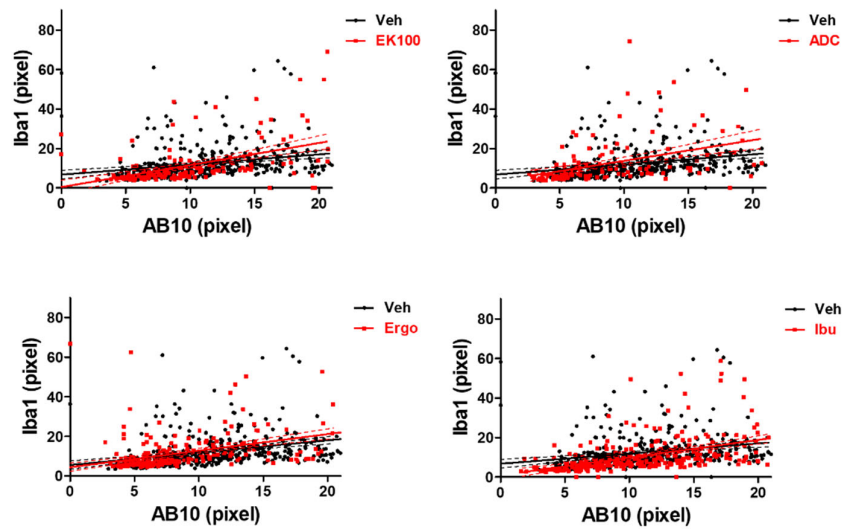

**Figure S3. Plaque-associated microglia clustering is not affected by the treatment of four reagents.** Scatter plots of AB-10-stained area of each plaque-associated microglia cluster in the brain slice. Solid lines: linear regression; dashed line 95% confidence intervals.
